# Supplementary material for: Low socioeconomic status is associated with self-reported HIV positive status among young MSM in Brazil and Peru
Source: Springer Nature journal article supplement (doi:10.1186/s12879-021-06455-3), 2021-07-31
Supplement: MOESM1 [file 19408510]

## SURVEY INSTRUMENT

**1. To which gender do you most identify with?**

- Cisgender man
- Cisgender woman → stop the survey
- Transgender man → stop the survey
- Transgender woman → stop the survey
- Travesti → stop the survey
- Other genders: \_\_\_\_\_ → stop the survey

**2. Is this the first time you complete this questionnaire?**

- Yes
- No → stop the survey

**3. Where did you hear about this survey?**

- Grindr
- Facebook
- Hornet
- Other. Please, complete: \_\_\_\_\_

**4. In which city do you live? (diferente options for Brazil, Mexico and Peru)**

**5. How old are you?**

years → If under 18 years, stop the questionnaire

**6. What is your highest level of education?**

- No education
- Preliminary school (1-4 years)
- Primary school (5-9 years)
- Secondary school (10-12 years)
- Undergraduation (13-16 years)
- Graduation (>16 years)

**7. What is your race? (For Brazil and Peru only)**

- Black
- Brown, Pardo or Mestizo (Mixed)
- White
- Indigenous
- Asian

**7b- Do you self-identify as indigenous?**

- Yes
- No

**8. What is your montly income?**

- No income
- 1 minimum wage or less
- >1 to 3 minimun wages
- >3 to 4 minimum wages
- >4 to 5 minimum wages
- >5 to 10 minimum wages
- More than 10 minimun wages

**9. Who do you fell the most sexual attraction to?**

- Men
- Women
- Both
- I don't want to answer

**10. Do you have a steady partner?**

- No
- Yes

**11. When was the last time have you been tested for HIV?**

- Never
- Last 3 months
- Last 6 months
- Last year
- More than a year ago
- I don't want to answer

**12. Have you ever tested positive for HIV?**

- Yes
- No
- I don't want to answer
